# Supplementary material
Source: HighWire-hosted journal article supplement (http://www.jneurosci.org/highwire/filestream/599699/field_highwire_adjunct_files/2/Supplemental_Legend.pdf)
Supplement: Supplemental_Legend.pdf [file Supplemental_Legend.pdf]

**Supp. Fig. 1. Mating assays show that dFMRP and LARK interact.** Growth of colonies on medium lacking Histidine indicates that *dfmr1* bait 60-3 interacts with a full-length LARK product.

**Supp. Fig. 2. dFMRP amount is inversely correlated with LARK level in the PDF neurons.** **A.** Representative images showing immunoreactivity for dFMRP, LARK and PDF in the large and small LN<sub>v</sub> (PDF) neurons of flies with decreased (*pdf>larki*) or increased (*pdf>uas-lark*) LARK amounts. Images represent single 2- $\mu$ m optical sections through PDF neurons (green, dFMRP, blue, PDF). Images showing the small LN<sub>v</sub> neurons were enhanced to better depict PDF staining. Arrows indicate the positions of PDF neurons in each image. **B.** Quantification of dFMRP, LARK, and PDF pixel intensities in the two groups of ventral lateral neurons (PDF neurons). Pixel intensities for each genotype were normalized by expressing each as a percentage of the control genotype (*uas-larki* for *pdf>uas-larki* or *uas-lark* for *pdf>uas-lark*). Error bars indicate standard error of the mean (SEM). Asterisks represent statistically significant changes in mean pixel intensity compared to the control genotype (Student's t-test,  $p < 0.05$ ). The results shown in panel B represent the analysis of multiple PDF cells in three independent experiments (*uas-larki* – LN<sub>v</sub>, n=47; sLN<sub>v</sub>, n=53. *pdf>uas-larki* – lLN<sub>v</sub>, n=36; sLN<sub>v</sub>, n=36. *uas-lark* – lLN<sub>v</sub>, n=23, sLN<sub>v</sub>, n=17. *pdf>uas-lark* – lLN<sub>v</sub>, n=35; sLN<sub>v</sub>, n=31).
